# Supplementary material
Source: PubMed Central journal article supplement (PMC4925176)
Supplement: NIHMS772785-supplement-2.pdf [file NIHMS772785-supplement-2.pdf]

**Table S1. Sequencing statistics for informative orbital and ocular adnexal lymphomas**

| <b>Sample</b>  | <b>Mapped Reads</b> | <b>On Target</b> | <b>Mean Depth</b> | <b>Uniformity</b> |
|----------------|---------------------|------------------|-------------------|-------------------|
| IE-01          | 475,068             | 97.8%            | 139               | 90.5%             |
| IE-02          | 1,198,553           | 98.3%            | 355               | 85.6%             |
| IE-03          | 1,307,356           | 98.2%            | 389               | 89.5%             |
| IE-04          | 751,659             | 98.5%            | 224               | 84.9%             |
| IE-05          | 1,609,024           | 98.2%            | 479               | 88.8%             |
| IE-06          | 1,071,293           | 97.6%            | 313               | 83.9%             |
| IE-07          | 1,213,220           | 98.1%            | 358               | 88.4%             |
| IE-08          | 2,469,002           | 98.3%            | 728               | 83.4%             |
| IE-09          | 1,791,846           | 97.2%            | 520               | 90.4%             |
| IE-10          | 831,116             | 97.8%            | 242               | 88.7%             |
| IE-11          | 2,579,189           | 96.8%            | 741               | 88.1%             |
| IE-12          | 1,793,249           | 97.9%            | 523               | 89.5%             |
| IE-13          | 2,625,398           | 97.2%            | 748               | 87.3%             |
| IE-14          | 2,227,155           | 97.8%            | 646               | 87.5%             |
| IE-15          | 2,946,426           | 97.9%            | 860               | 87.6%             |
| IE-16          | 1,398,441           | 98.2%            | 415               | 85.7%             |
| IE-17          | 1,955,364           | 98.3%            | 581               | 85.9%             |
| IE-18          | 2,242,925           | 98.3%            | 666               | 87.8%             |
| IE-19          | 832,754             | 98.5%            | 250               | 90.5%             |
| IE-20          | 1,333,225           | 98.6%            | 403               | 91.5%             |
| IE-21          | 834,096             | 98.5%            | 250               | 88.4%             |
| IE-22          | 3,296,664           | 98.4%            | 988               | 89.4%             |
| IE-23          | 3,456,374           | 95.1%            | 962               | 62.9%             |
| IE-24          | 3,586,389           | 97.8%            | 1,035             | 86.1%             |
| IE-25          | 1,585,151           | 95.5%            | 444               | 89.8%             |
| IE-27          | 2,904,798           | 97.2%            | 838               | 88.3%             |
| IE-29          | 1,149,546           | 97.9%            | 335               | 86.9%             |
| IE-30          | 2,820,224           | 98.3%            | 828               | 84.9%             |
| IE-32          | 3,732,365           | 97.7%            | 1,086             | 87.3%             |
| IE-33          | 1,292,583           | 97.8%            | 378               | 88.5%             |
| IE-34          | 1,421,675           | 97.2%            | 413               | 91.6%             |
| IE-35          | 1,225,099           | 96.2%            | 343               | 83.3%             |
| IE-36          | 1,631,165           | 97.3%            | 470               | 89.3%             |
| IE-37          | 2,432,098           | 97.1%            | 693               | 83.1%             |
| IE-38          | 2,914,581           | 98.1%            | 860               | 89.4%             |
| IE-39          | 450,316             | 92.6%            | 114               | 82.5%             |
| <b>Average</b> | <b>1,871,816</b>    | <b>97.6%</b>     | <b>545</b>        | <b>86.9%</b>      |

Orbital and ocular adnexal lymphomas were subjected to next generation sequencing of multiplexed templates using Ion PI chips on the Proton sequencer Multiplexed PCR. For all informative samples, the number of mapped reads, % reads on target, average read coverage depth over targeted bases and uniformity of mapped reads are shown. Average values for the cohort are given.
