# Supplementary material
Source: PubMed Central journal article supplement (PMC4925176)
Supplement: NIHMS772785-supplement-3.pdf [file NIHMS772785-supplement-3.pdf]

**Table S2. Prioritized mutations and high level copy number alterations (CNAs) across informative sequenced orbital and ocular adnexal lymphomas (OOALs)**

| Sample | Subtype | Alteration Type | Location        | Gene   | Ref.      | Var. | AA Change    | Var. freq. | CNA           | Log <sub>2</sub> CNRatio | Onc/TSG  | Epigenetic |
|--------|---------|-----------------|-----------------|--------|-----------|------|--------------|------------|---------------|--------------------------|----------|------------|
| IE-37  | FL      | Mutation        | chr1:27087894   | ARID1A | GGCCACCCA | G    | p.727_730del | 0.44       | N/A           | N/A                      | TSG      | Yes        |
| IE-39  | DLBCL   | Mutation        | chr1:27100375   | ARID1A | C         | T    | p.Q1363X     | 0.11       | N/A           | N/A                      | TSG      | Yes        |
| IE-07  | FL      | Mutation        | chr1:27057736   | ARID1A | C         | T    | p.Q482X      | 0.26       | N/A           | N/A                      | TSG      | Yes        |
| IE-32  | DLBCL   | Mutation        | chr11:108183151 | ATM    | G         | T    | p.E1978X     | 0.49       | N/A           | N/A                      | TSG      | No         |
| IE-13  | DLBCL   | Mutation        | chr7:55249028   | EGFR   | C         | T    | p.R776C      | 0.11       | N/A           | N/A                      | Oncogene | No         |
| IE-17  | FL      | Mutation        | chr7:148508728  | EZH2   | A         | T    | p.Y646N      | 0.23       | N/A           | N/A                      | Oncogene | Yes        |
| IE-11  | FL      | Mutation        | chr7:148508728  | EZH2   | A         | T    | p.Y646N      | 0.16       | N/A           | N/A                      | Oncogene | Yes        |
| IE-39  | DLBCL   | Mutation        | chr7:148508727  | EZH2   | T         | G    | p.Y646S      | 0.37       | N/A           | N/A                      | Oncogene | Yes        |
| IE-13  | DLBCL   | Mutation        | chr4:187557927  | FAT1   | G         | A    | p.R1262X     | 0.11       | N/A           | N/A                      | TSG      | No         |
| IE-37  | FL      | Mutation        | chr10:8100362   | GATA3  | G         | A    | p.W112X      | 0.11       | N/A           | N/A                      | TSG      | No         |
| IE-37  | FL      | Mutation        | chr11:533878    | HRAS   | C         | T    | p.G60S       | 0.11       | N/A           | N/A                      | Oncogene | No         |
| IE-35  | FL      | Mutation        | chr19:36228097  | KMT2B  | C         | T    | p.Q2495X     | 0.29       | N/A           | N/A                      | TSG      | Yes        |
| IE-39  | DLBCL   | Mutation        | chr5:56171042   | MAP3K1 | C         | T    | p.Q624X      | 0.14       | N/A           | N/A                      | TSG      | No         |
| IE-24  | MZL     | Mutation        | chrX:70339260   | MED12  | A         | C    | p.N46T       | 0.99       | N/A           | N/A                      | Oncogene | No         |
| IE-24  | MZL     | Mutation        | chr3:38182035   | MYD88  | T         | C    | p.I220T      | 0.38       | N/A           | N/A                      | Oncogene | No         |
| IE-13  | DLBCL   | Mutation        | chr3:38182641   | MYD88  | T         | C    | p.L265P      | 0.90       | N/A           | N/A                      | Oncogene | No         |
| IE-18  | DLBCL   | Mutation        | chr3:38182641   | MYD88  | T         | C    | p.L265P      | 0.48       | N/A           | N/A                      | Oncogene | No         |
| IE-32  | DLBCL   | Mutation        | chr3:38182641   | MYD88  | T         | C    | p.L265P      | 0.39       | N/A           | N/A                      | Oncogene | No         |
| IE-12  | MZL     | Mutation        | chr3:38182641   | MYD88  | T         | C    | p.L265P      | 0.52       | N/A           | N/A                      | Oncogene | No         |
| IE-15  | MZL     | Mutation        | chr3:38182641   | MYD88  | T         | C    | p.L265P      | 0.36       | N/A           | N/A                      | Oncogene | No         |
| IE-05  | MZL     | Mutation        | chr3:38182641   | MYD88  | T         | C    | p.L265P      | 0.47       | N/A           | N/A                      | Oncogene | No         |
| IE-16  | DLBCL   | Mutation        | chr3:38182259   | MYD88  | T         | C    | p.M232T      | 0.27       | N/A           | N/A                      | Oncogene | No         |
| IE-08  | MZL     | Mutation        | chr3:38182259   | MYD88  | T         | C    | p.M232T      | 0.44       | N/A           | N/A                      | Oncogene | No         |
| IE-06  | DLBCL   | Mutation        | chr3:38182032   | MYD88  | C         | G    | p.S219C      | 0.31       | N/A           | N/A                      | Oncogene | No         |
| IE-39  | DLBCL   | Mutation        | chr17:29664869  | NF1    | G         | A    | p.W2225X     | 0.10       | N/A           | N/A                      | TSG      | No         |
| IE-04  | MZL     | Mutation        | chr9:139397775  | NOTCH1 | C         | T    | p.V1676I     | 0.61       | N/A           | N/A                      | TSG      | No         |
| IE-32  | DLBCL   | Mutation        | chr1:115256530  | NRAS   | G         | T    | p.Q61K       | 0.20       | N/A           | N/A                      | Oncogene | No         |
| IE-39  | DLBCL   | Mutation        | chr5:176675278  | NSD1   | C         | T    | p.Q1532X     | 0.11       | N/A           | N/A                      | TSG      | Yes        |
| IE-16  | DLBCL   | Mutation        | chr10:89624303  | PTEN   | C         | T    | p.T26I       | 0.40       | N/A           | N/A                      | TSG      | No         |
| IE-35  | FL      | Mutation        | chr1:16259360   | SPEN   | C         | T    | p.Q2209X     | 0.16       | N/A           | N/A                      | TSG      | No         |
| IE-16  | DLBCL   | Mutation        | chr1:16260237   | SPEN   | G         | A    | p.W2501X     | 0.36       | N/A           | N/A                      | TSG      | No         |
| IE-38  | FL      | Mutation        | chr17:7577515   | TP53   | GTGA      | G    | p.255_256del | 0.24       | N/A           | N/A                      | TSG      | No         |
| IE-07  | FL      | Mutation        | chr17:7577550   | TP53   | C         | T    | p.G244D      | 0.21       | N/A           | N/A                      | TSG      | No         |
| IE-06  | DLBCL   | Mutation        | chr17:7578406   | TP53   | C         | T    | p.R175H      | 0.36       | N/A           | N/A                      | TSG      | No         |
| IE-07  | FL      | Mutation        | chr17:7577538   | TP53   | C         | T    | p.R248Q      | 0.23       | N/A           | N/A                      | TSG      | No         |
| IE-13  | DLBCL   | CNA             | chr9            | CDKN2A | N/A       | N/A  | N/A          | N/A        | two copy loss | -3.73                    | TSG      | No         |
| IE-18  | DLBCL   | CNA             | chr9            | CDKN2A | N/A       | N/A  | N/A          | N/A        | two copy loss | -4.26                    | TSG      | No         |
| IE-32  | DLBCL   | CNA             | chr9            | CDKN2A | N/A       | N/A  | N/A          | N/A        | two copy loss | -2.70                    | TSG      | No         |
| IE-29  | MZL     | CNA             | chr9            | CDKN2A | N/A       | N/A  | N/A          | N/A        | two copy loss | -2.37                    | TSG      | No         |
| IE-13  | DLBCL   | CNA             | chr4            | FAT1   | N/A       | N/A  | N/A          | N/A        | two copy loss | -1.75                    | TSG      | No         |
| IE-18  | DLBCL   | CNA             | chr10           | PTEN   | N/A       | N/A  | N/A          | N/A        | two copy loss | -1.34                    | TSG      | No         |

All high confidence, prioritized, somatic non-synonymous mutations and high-level CNAs (see **Methods**) identified across the 36 informative OOALs are shown. For each variant the sample, subtype (follicular lymphoma [FL], diffuse large B-cell lymphoma [DLBCL] and marginal zone lymphoma [MZL]), alteration type, chromosomal location and gene are indicated. For mutations, the (Ref.) and variant (Var.) alleles, amino acid (AA) change and flow corrected variant allele frequency (Var. freq.) are shown. For CNAs, gain or loss and log<sub>2</sub> copy number ratios are shown. Gene type (Oncogene [Onc] vs. Tumor suppressor [TSG]) and known status as an epigenetic regulator are shown.
